# Supplementary material
Source: ML conference proceedings conference paper supplement (https://openreview.net/forum?id=t0_0zJqMmT)

(a)

Ground truth  
(Optimal structure)

SchNet

ForceNet

DimeNet

MXMNet

ET

Ours

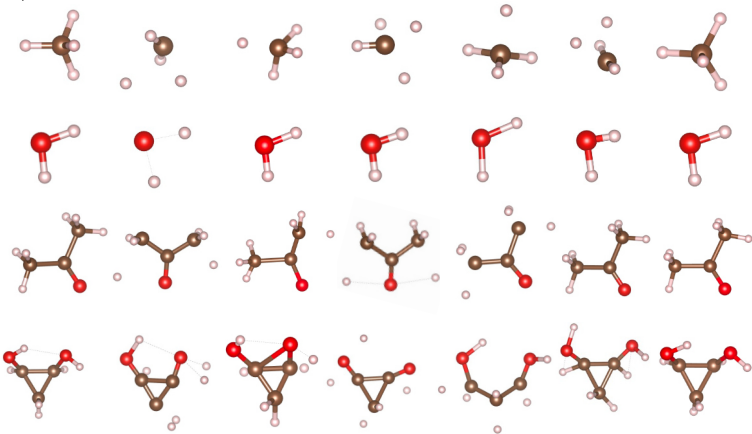

(b)

Probability

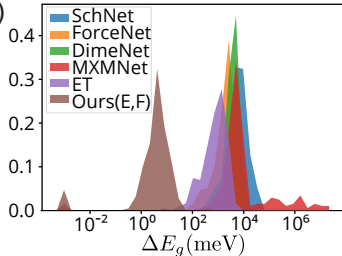

(c)

Probability

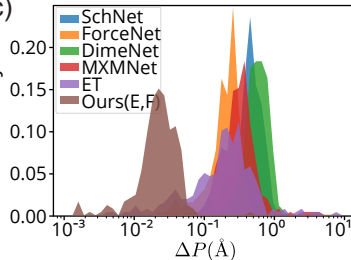

Supplement: supplementary_material [file attachment]
